# Supplementary material
Source: Springer Nature journal article supplement (https://www.springermedizin.de/resource/supplementary/12936_2011_1918_MOESM8_ESM.pdf/9541982)
Supplement: MOESM8 [file 9541982]

DAYS AFTER FIRST MOSQUITO BITES

0 90 180 270 360 450 540

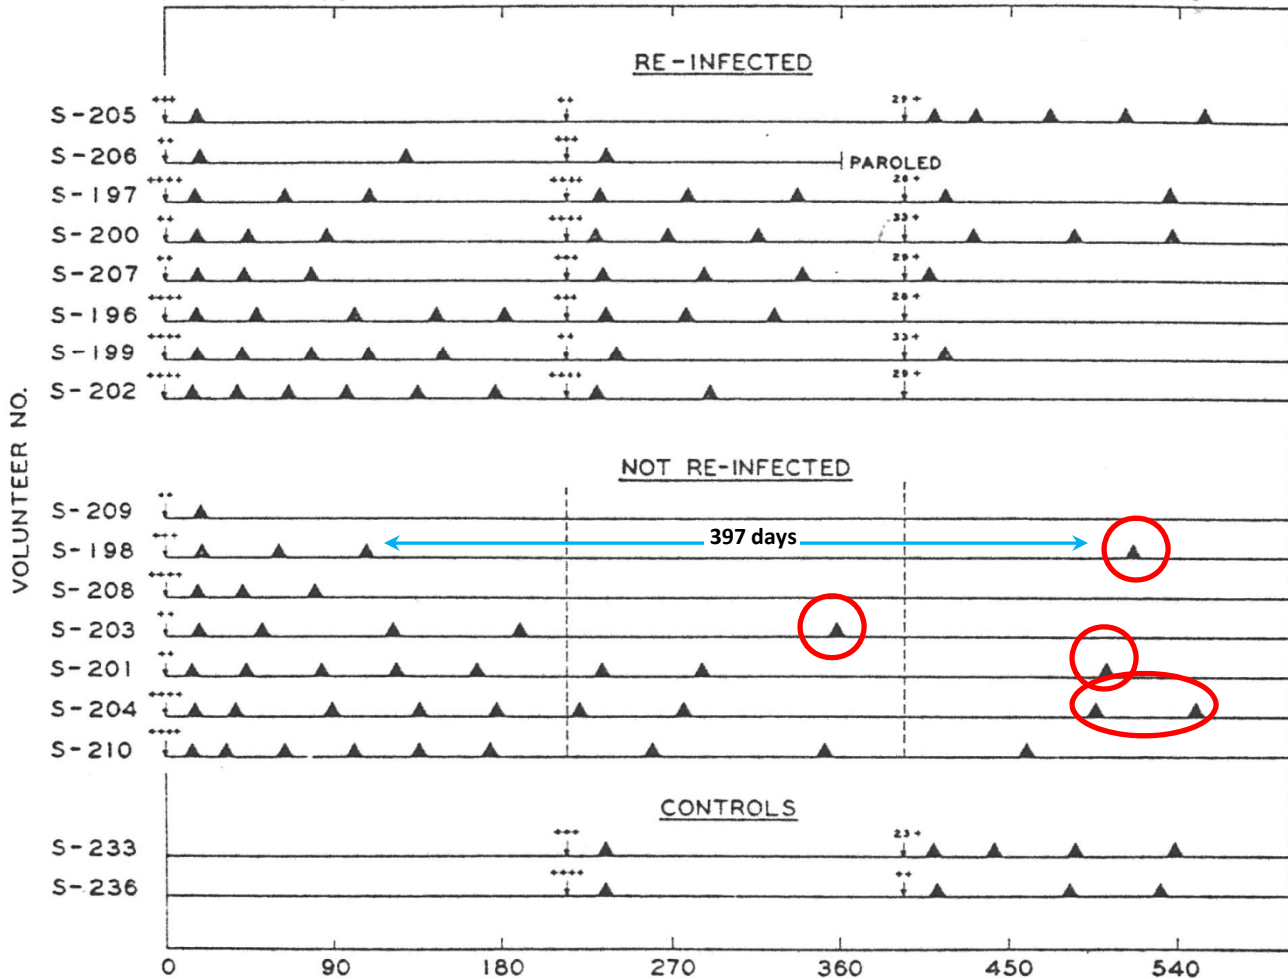

▲ = MALARIAL ATTACK TREATED WITH CHLOROQUINE, 0.3 GM.

↓ = MOSQUITO BITES, WITH INFECTIVE INOCULUM (AS PLUSES).
